# Supplementary material
Source: publisher site journal article supplement (https://www.dovepress.com/article/513102)
Supplement: Supplementary file 1 [file 513102%2520%2509Supplementary%2520materials.docx]

**Supplementary Table S1.** Coefficients of each gene in risk model.

| **Gene** | **Coefficient** |
| --- | --- |
| ABCB4 | -0.473301216691802 |
| CEL | 0.492269172363858 |
| CRABP2 | 0.701799082928005 |
| EPHX2 | -0.0929506867665202 |
| HAO2 | -0.38877843941001 |
| HSD11B2 | -0.707739991490133 |
| HSD3B7 | 1.55076724151043 |
| SULT2B1 | 0.24532696409661 |
| TOP2A | 1.03371800491136 |

**Supplementary Table S2.** Sequences of si-TOP2A and primers

| Gene | 5’ - 3’ | 3’ - 5’ |
| --- | --- | --- |
| si- TOP2A #1 | GGAGAAGAUUAUACAUGUAUC | UACAUGUAUAAUCUUCUCCAU |
| si- TOP2A #2 | GCAAUUCUAUGCUGACAUAAC | UAUGUCAGCAUAGAAUUGCUG |
| si-NC | UUCUCCGAACGUGUCACGUTT | ACGUGACACGUUCGGAGAATT |
| TOP2A | AACAGCCTGTACCCTGATGG | CGGTAGTGCCCATCATTCTT |
| GAPDH | AACTTTGGCATTGTGGAAGG | ACACATTGGGGGTAGGAACA |


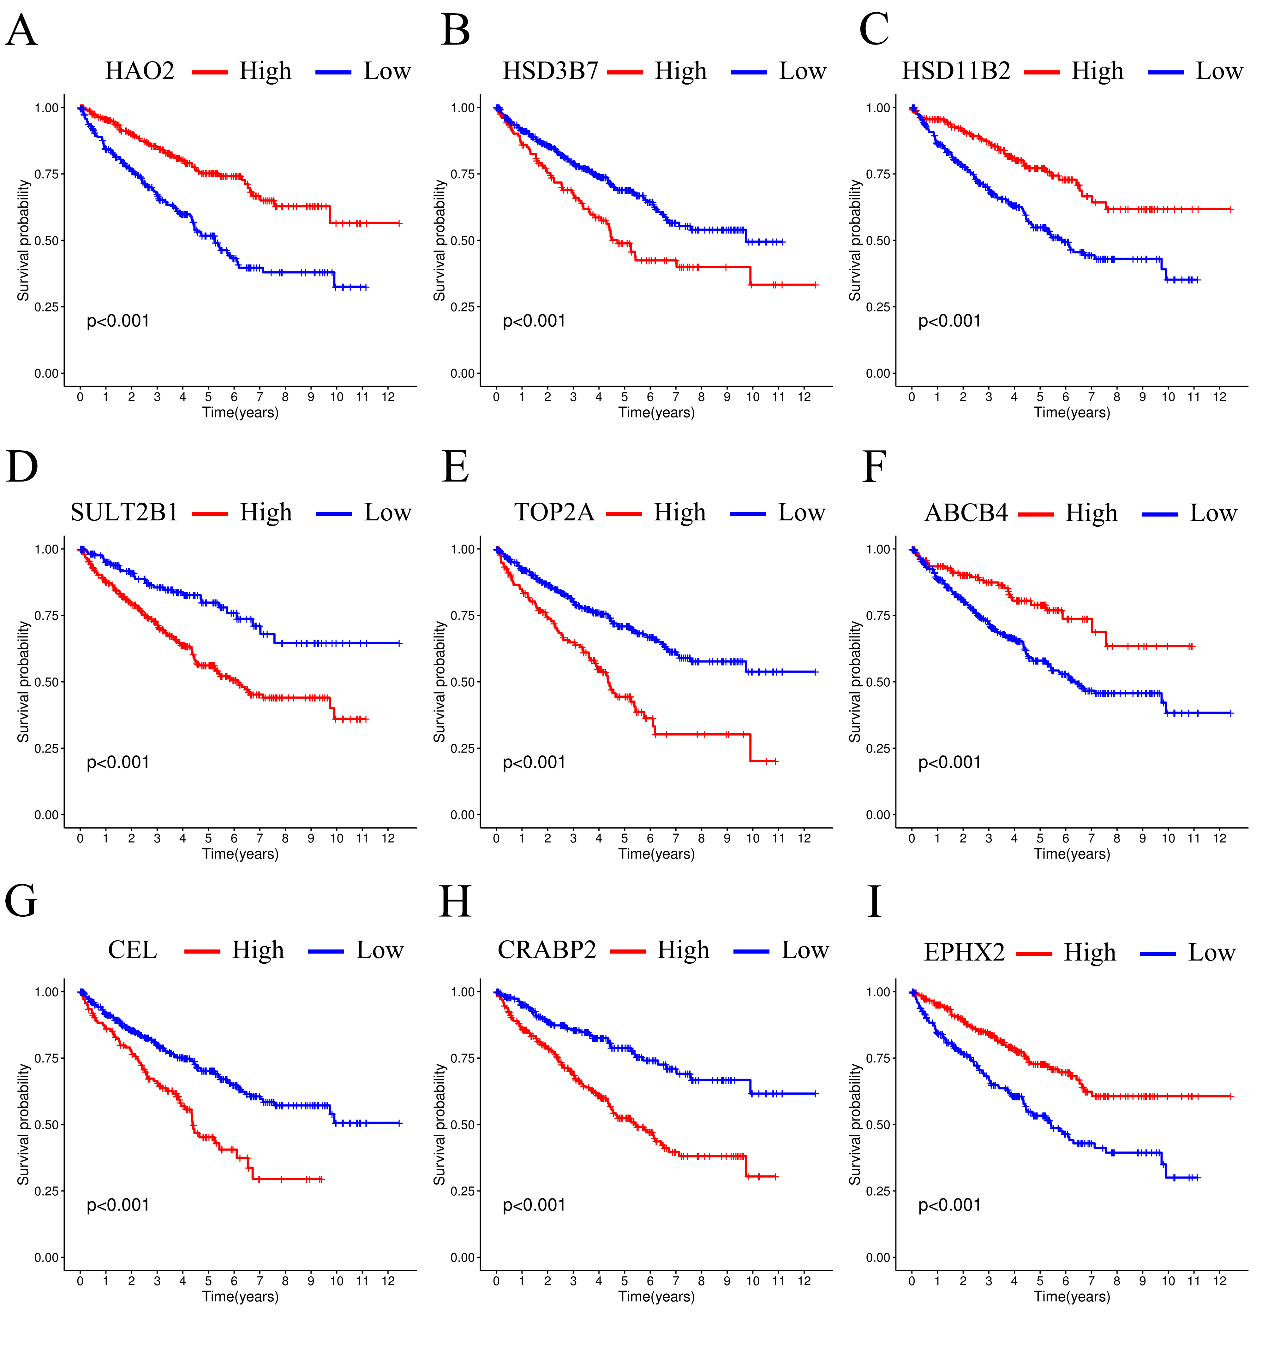


**Supplementary Figure S1.** Survival analysis of each prognostic gene in TCGA cohort. (A) HAO2. (B) HSD3B7. (C) HSD11B2. (D) SULT2B1. (E) TOP2A. (F) ABCB4. (G) CEL. (H) CRABP2. (I) EPHX2.


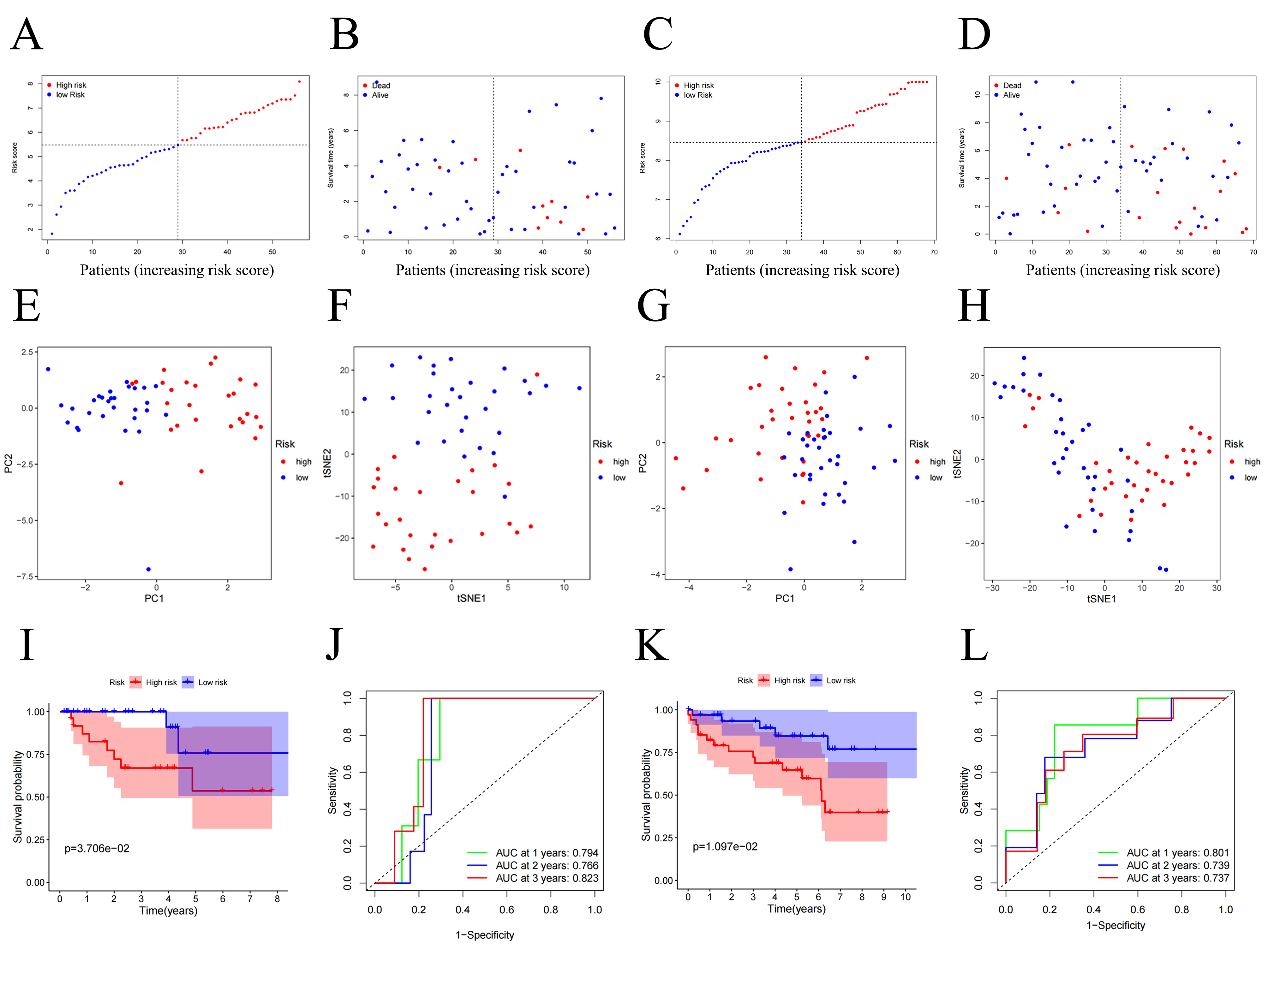
**Supplementary Figure S2.** Prognostic analysis of the risk model in validation cohorts. The distribution and median value of the risk scores in GSE167573 cohort (**A**) and FAHWMU cohort (**C**). Distributions of the overall survival (OS) status in GSE167573 cohort (**B**) and FAHWMU cohort (**D**). PCA plot in GSE167573 cohort (**E**) and FAHWMU cohort (**G**). t-SNE analysis in GSE167573 cohort (**F**) and FAHWMU cohort (**H**). Kaplan-Meier curves for OS of patients in the high-risk group and low-risk group in GSE167573 cohort (**I**) and FAHWMU cohort (**K**). Time-dependent ROC curves for OS in GSE167573 cohort (**J**) and FAHWMU cohort (**L**).


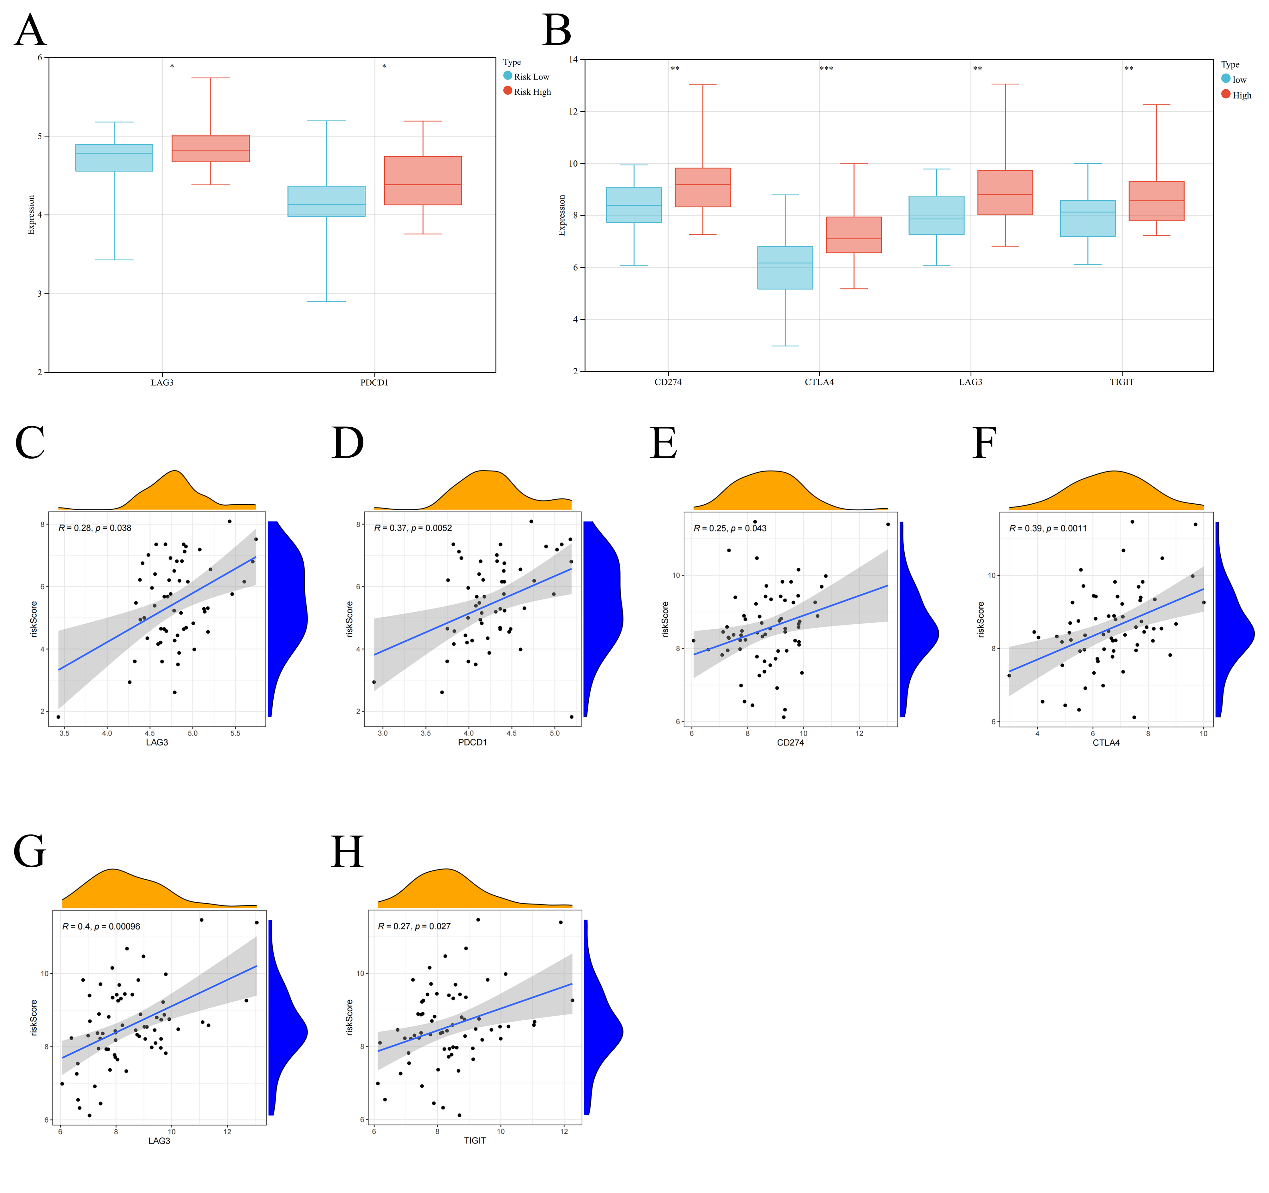


**Supplementary Figure S3.** Association between risk score and immune checkpoint genes in validation cohorts. (**A**) The expression of immune checkpoint genes between high- and low-risk groups in GSE167573 cohort. (**B**) The expression of immune checkpoint genes between high- and low-risk groups in FAHWMU cohort. (**C**) Correlation between risk score and LAG3 in GSE167573 cohort. (**D**) Correlation between risk score and PDCD1 in GSE167573 cohort. (**E-H**) Correlation between risk score and CD274, CTLA4, LAG3, and TIGIT.


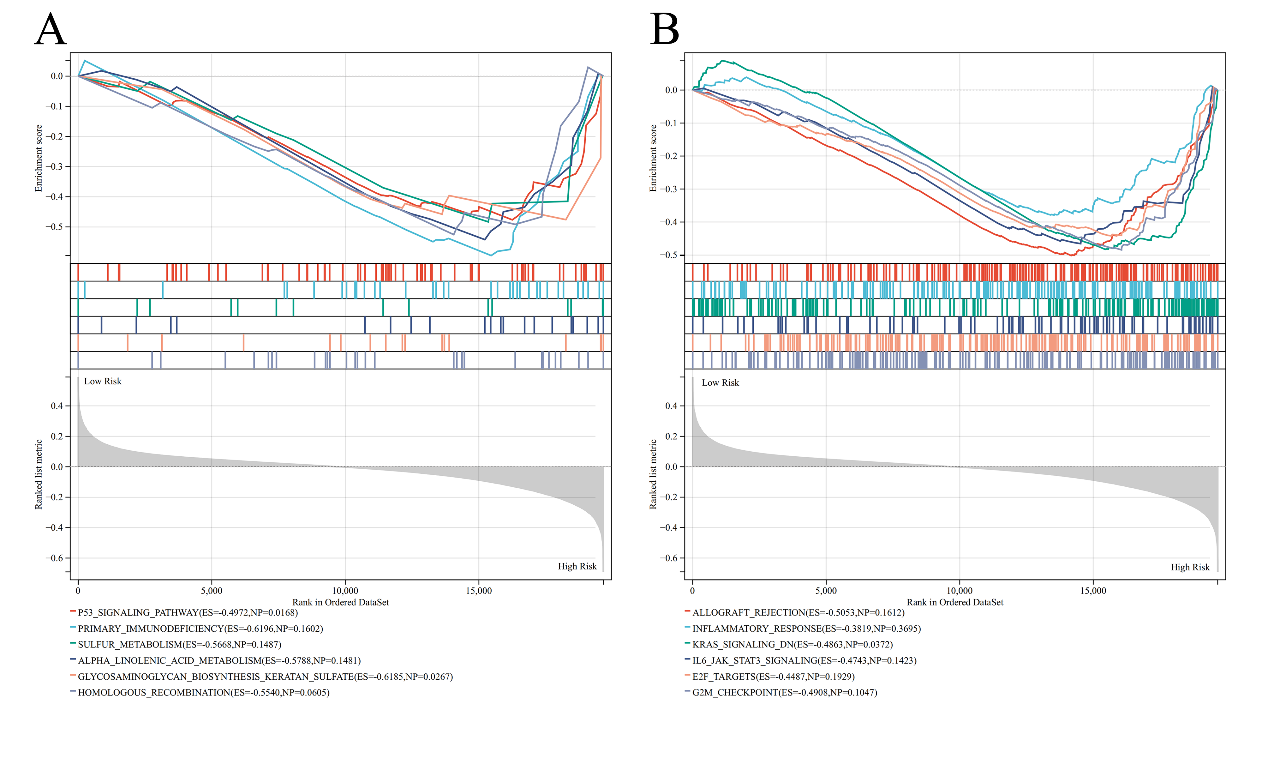


**Supplementary Figure S4.** GSEA. (**A**) KEGG. (**B**)Hallmark.


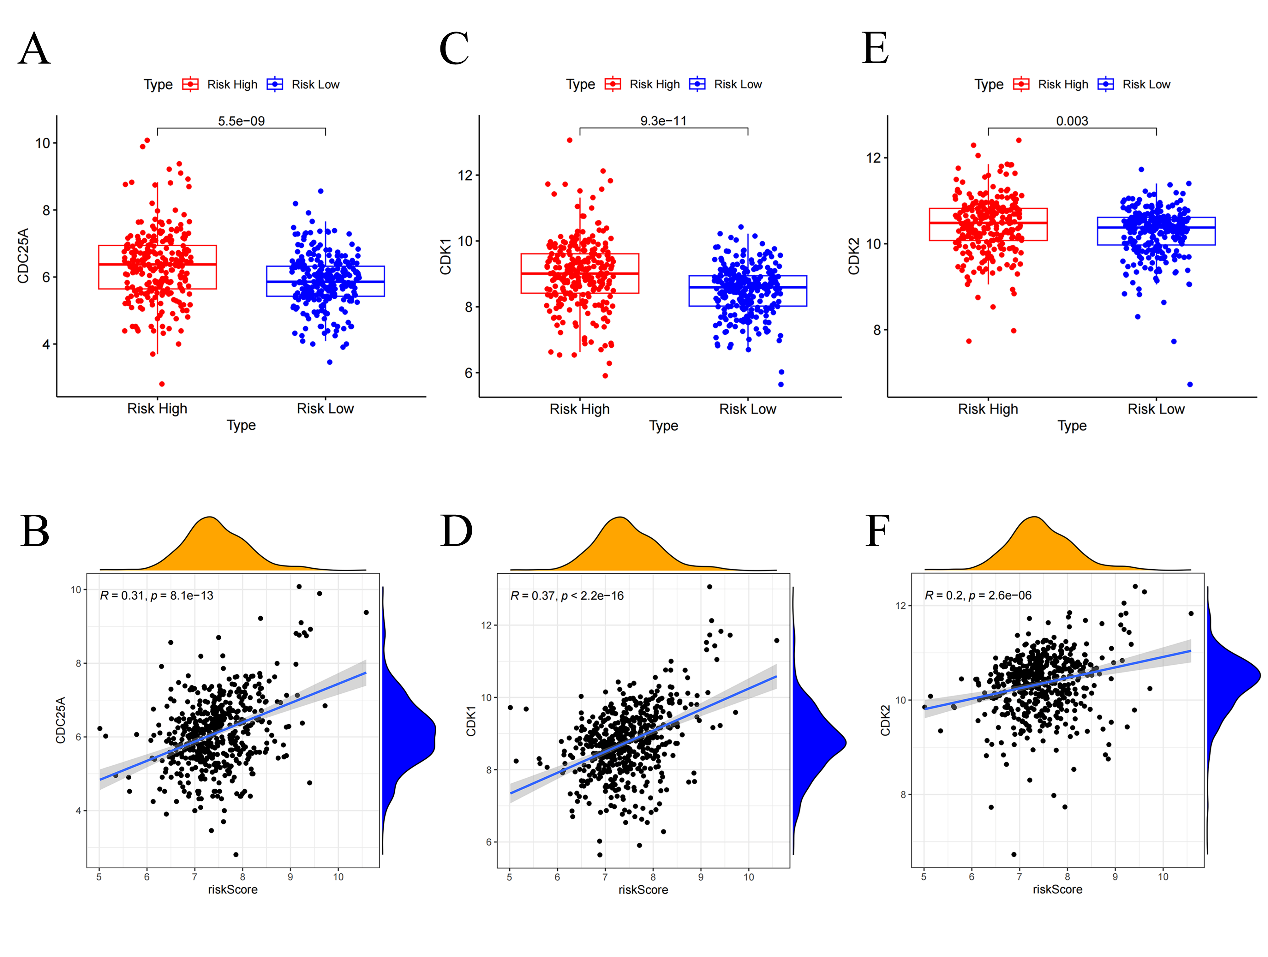


**Supplementary Figure S5.** Association between risk score and G2M pathway-related genes. (**A, C, E**) The expression of CDC25A (**A**), CDK1 (**C**), and CDK2 (**E**) in high- and low- risk groups. (**B, D, F**) The relationship between CDC25A (**B**), CDK1 (**D**), and CDK2 (**F**) and risk score.


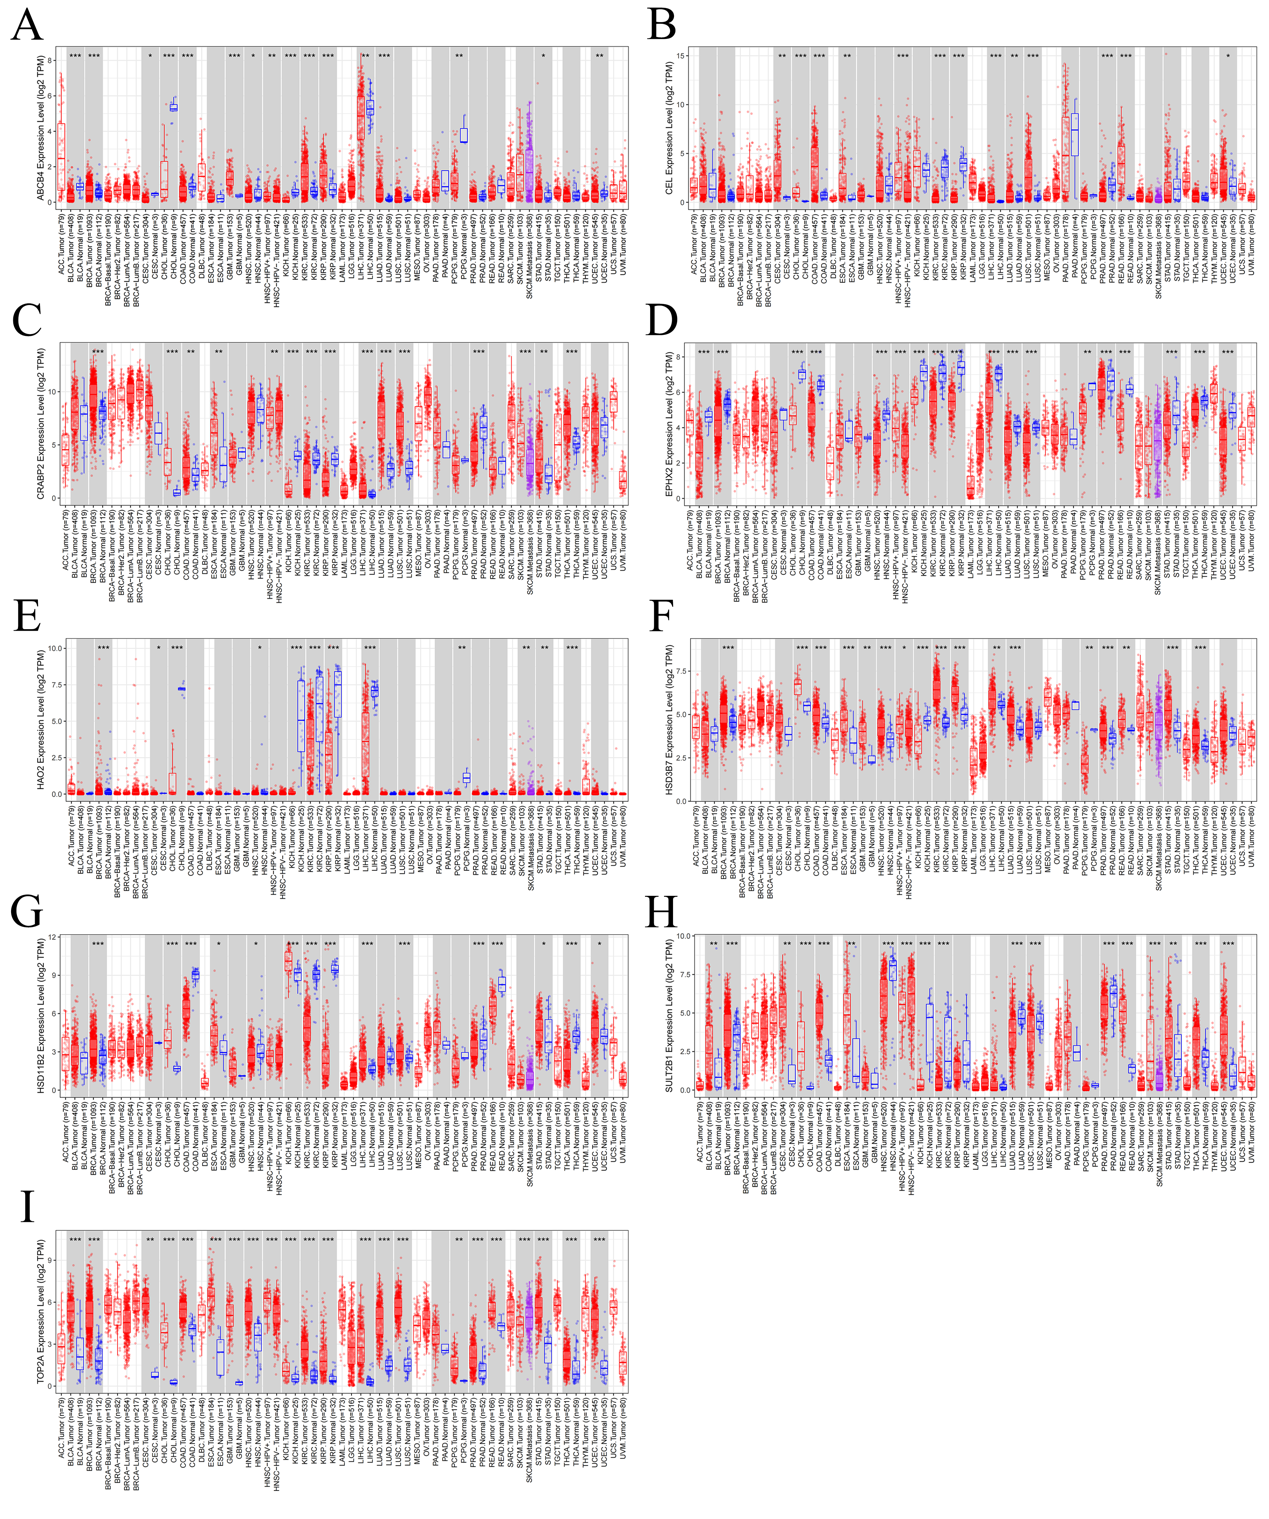


**Supplementary Figure S6.** Expression box diagram of gene expression in pan-cancer.(**A-I**)The gene expression of ABCB4, CEL, CRABP2, EPHX2, HAO2, HSD3B7, HSD11B2, SULT2B1 and TOP2Abetween tumor and adjacent normal tissue in pan-cancer. *P < 0.05, **P < 0.01, ***P < 0.001.
